# Supplementary material
Source: publisher figshare collection journal article supplement (https://future-science-group.figshare.com/ndownloader/files/34670806)
Supplement: Supplementary file 1 [file 34670806]

Supplementary Table 1 Transfection efficiencies on day 7 (%)

| Groups | Transfection efficiencies (mean ± SD) |
| --- | --- |
| Mock  siNC  siEomes-1  siEomes-2  siEomes-3  siIkzf2-1  siIkzf2-2  siIkzf2-3  siRunx2-1  siRunx2-2  siRunx2-3 | 0.17 ± 0.22  94.80 ± 1.30  77.47 ± 2.48  92.73 ± 0.46  88.53 ± 0.55  82.67 ± 4.70  87.70 ± 3.40  83.47 ± 5.88  84.67 ± 4.61  93.57 ± 2.57  83.97 ± 5.23 |
